# Supplementary material for: Development of a protein-based system for transient epigenetic repression of immune checkpoint molecule and enhancement of antitumour activity of natural killer cells
Source: PubMed Central journal article supplement (PMC7078285; doi:10.1038/s41416-019-0708-y), 2020-01-21

1 **SUPPLEMENTARY FIGURES**

2 Supplementary Figure S1

3 (A) Schematic structure of pEU-NTP-GM for expression in a cell-free protein expression  
4 system. Each NTP-GM protein was expressed with wheat germ extract and purified by  
5 glutathione beads (open arrow in left panel). After treatment with PreScission protease,  
6 the cleaved end-product (solid arrow in right panel) was confirmed and used for a DNA  
7 methylation assay. CBB protein staining images are shown. (B) *PD-1* mRNA expression  
8 in CEM, Jurkat, and MOLT-4 cells. Expression levels were normalized to *GAPDH* mRNA  
9 expression. Values represent the mean  $\pm$  SD. Three independent experiments were  
10 performed. (C) Bisulfite sequencing analysis of CR-C and CR-B from non-treated Jurkat,  
11 MOLT-4, and CEM cells.

12

13 Supplementary Figure S2

14 (A) Effects of NTP-GM-D17 on *PD-1* mRNA expression on primary PBMCs. Expression  
15 levels were normalized to *GAPDH* mRNA expression. Values represent the mean  $\pm$  SD  
16 of data obtained from three independent experiments. (B) NTP-GM-D17 represses PD-1

17 expression in primary PBMCs. Representative results of FACS analysis of the expression  
18 of PD-1 and CD3 are shown. (C) Expansion of PBMCs increases the number of PD-1<sup>+</sup>  
19 cells. PBMCs were cultured for 14 days in the presence of anti-CD3, anti-CD16 and IL-  
20 2, and subjected to FACS analysis. (D) Effects of NTP-GM-D17<sup>E752A</sup> on *PD-1* mRNA  
21 expression. Expression levels were normalized to *GAPDH* mRNA expression. Values  
22 represent the mean ± SD of three independent experiments. (E) No toxic effects of 1, 10,  
23 and 20 nM NTP-GM protein on PBMCs. Cytotoxicity assay was done by measuring LDH  
24 in the culture supernatant of PBMCs treated for 5 days with NTP-GM or NTP-SCR  
25 proteins. (F) NTP-GM-D17 reduces *PD-1* mRNA expression in PBMCs. PBMCs were  
26 treated for 5 days with NTP-GM-D17, and expression levels were evaluated at day 6, 9  
27 and 12 and normalized to the level of *GAPDH* mRNA. Data are shown as the mean ± SD  
28 (n = 3). N, non-treated; S, NTP-GM-SCR; D, NTP-GM-D17.

29

30 Supplementary Figure S3

31 (A) Tumor size monitored on day 7 after tumor inoculation. Luminescence signals of total  
32 7 mice, which were used in experiments shown in Figure 5C and Supplementary Figure

33 S3B, were integrated for analysis. No significant difference was observed in two groups  
34 of mice injected with control NK cells or treated NK cells. (B) IVIS imaging of mice  
35 injected the treated NK cells. (C) Integrated data of luminescence signals. Data of  
36 chronological monitoring by the IVIS imaging system on these three mice were analyzed.  
37 Tumor-bearing mice were injected with the treated NK cells. ROI, region of interest.

38

39 Supplementary Figure S4

40 (A) No apparent tumor formation by NTP-GM-D17. Ventrotomy images of mice injected  
41 with treated NK cells (protocol shown in Figure 5A) after 15 weeks from last injection  
42 are shown. NT, non-treated mouse. (B) No remarkable increase of white blood cell count  
43 in mice injected with treated NK cells. Numbers of white blood cells were counted.

Supplementary Figure S1

A

pEU-NTP-GMs plasmid

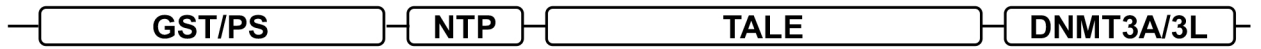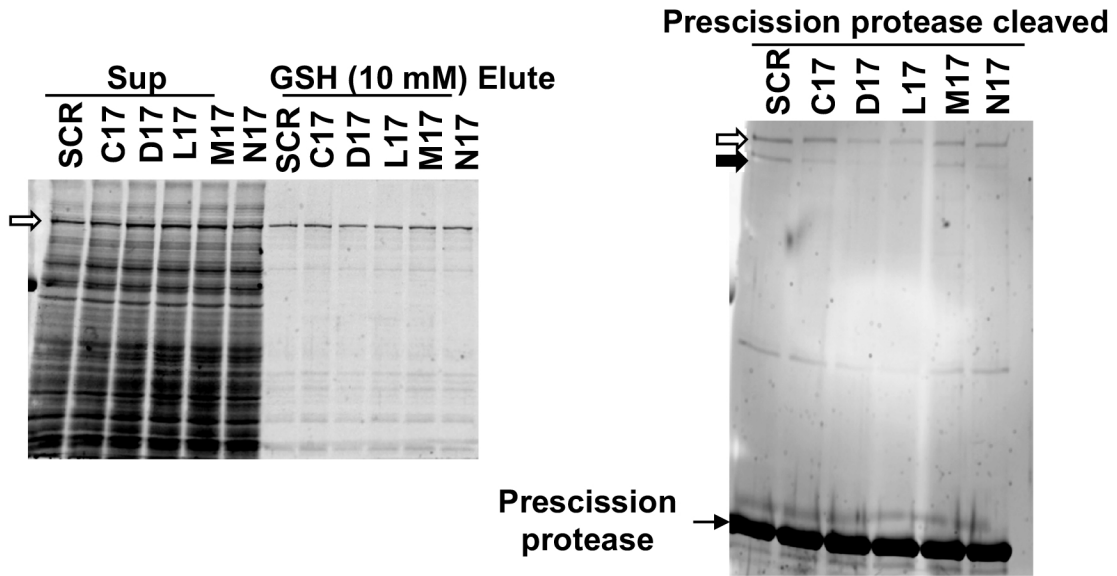

B

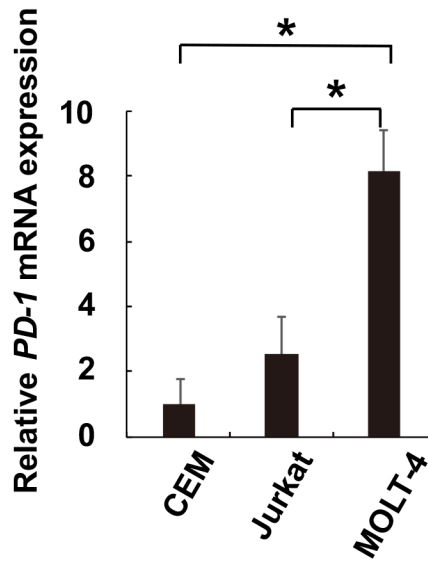

C

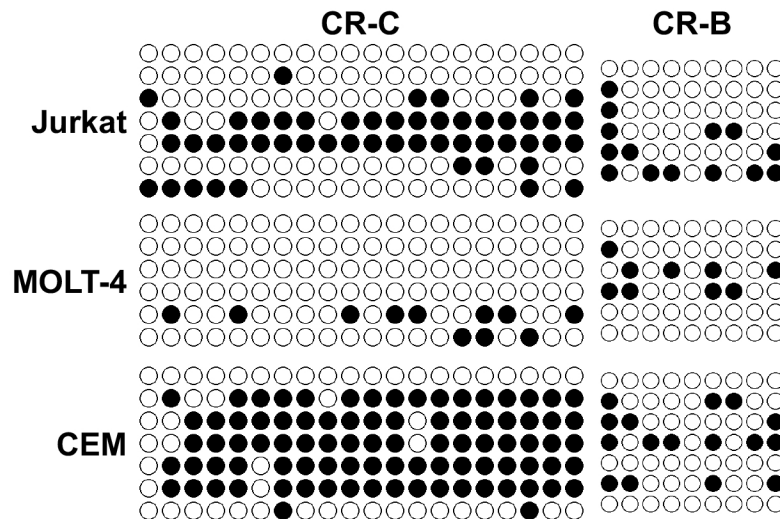

Supplementary Figure S2

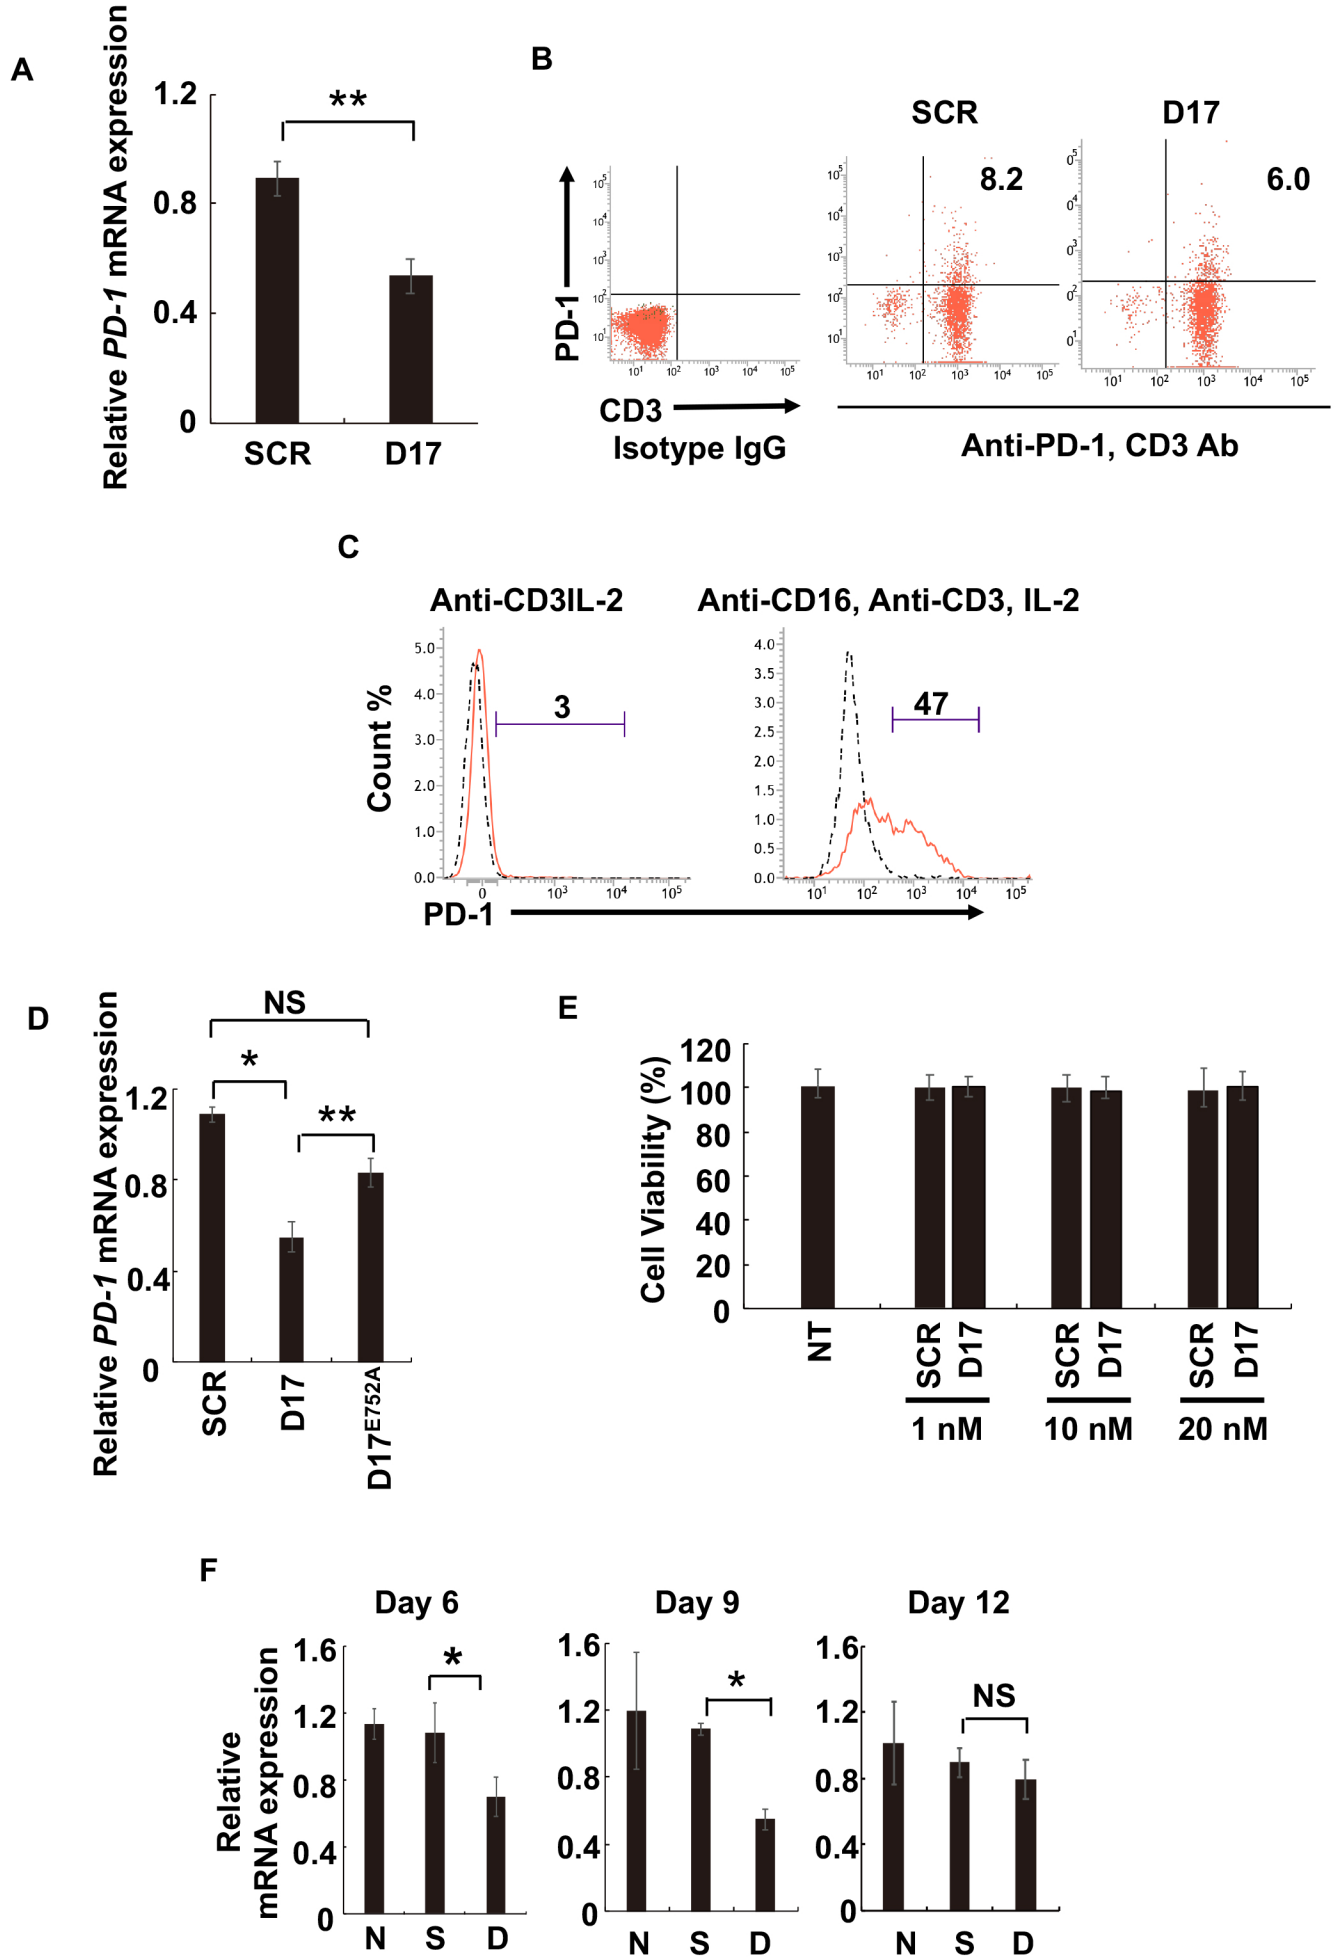

# Supplementary Figure S3

A

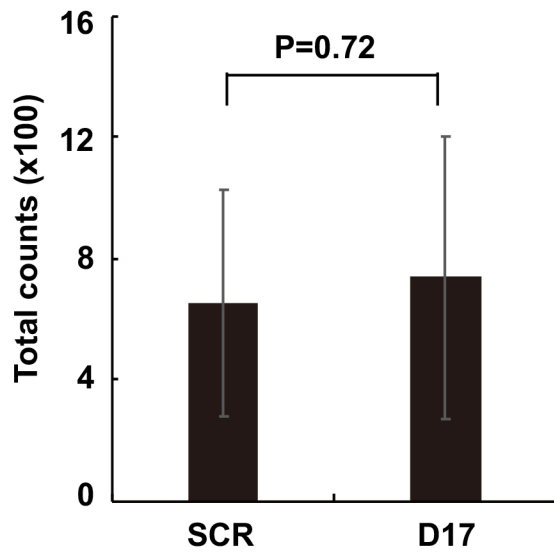

B

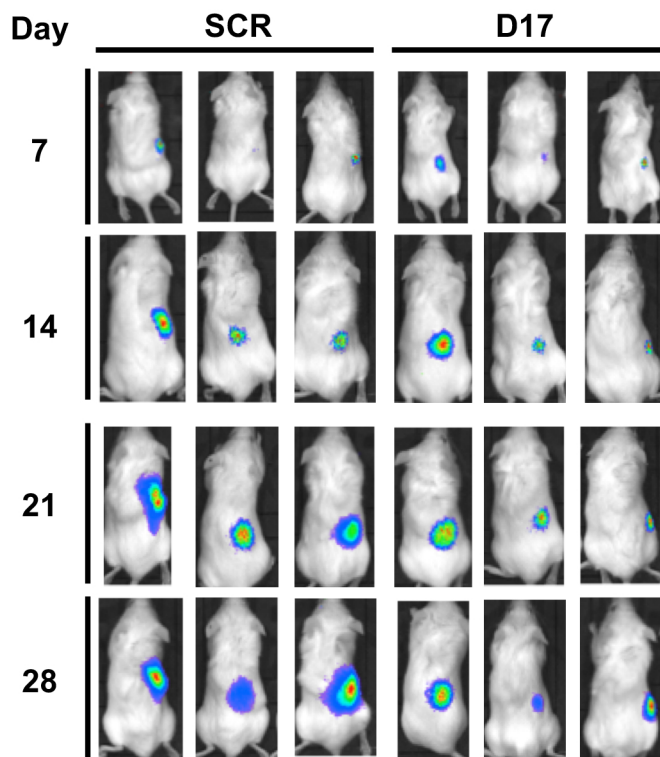

C

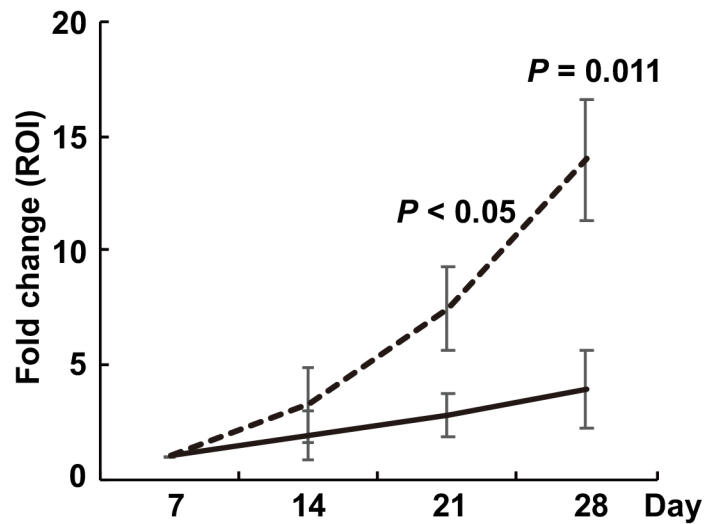

Supplementary Figure S4

A

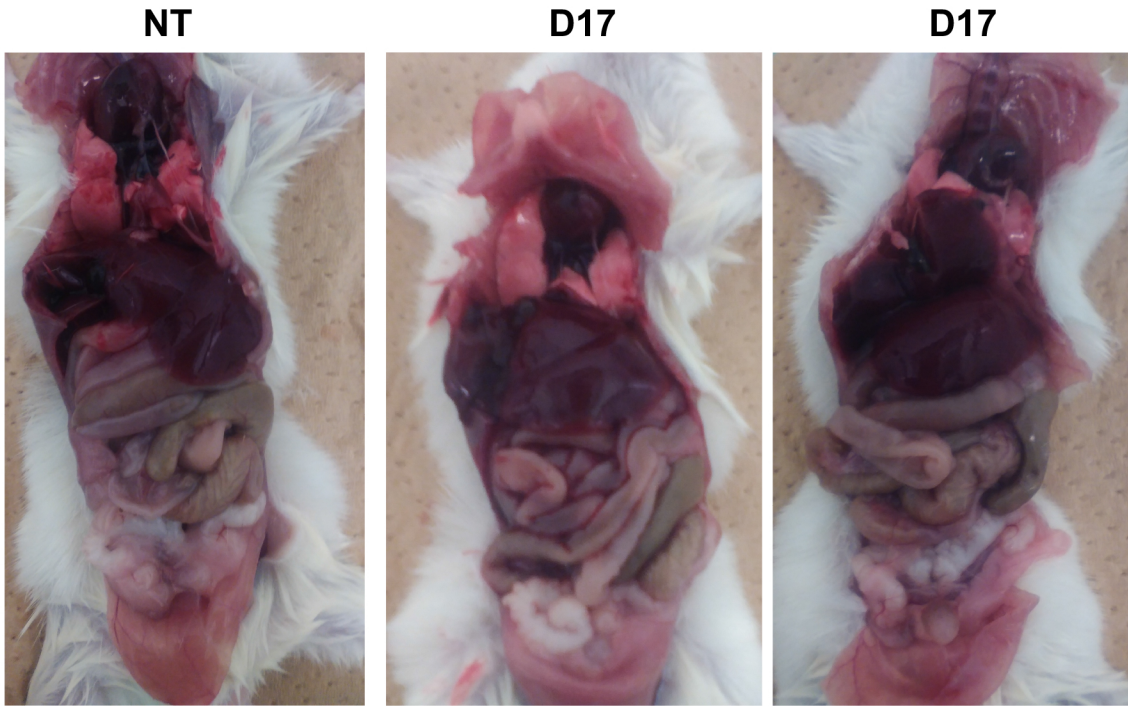

B

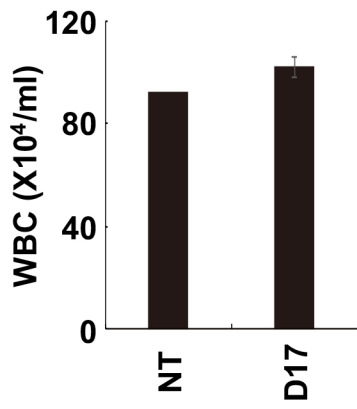

Supplement: 41416_2019_708_MOESM1_ESM.pdf [file 41416_2019_708_MOESM1_ESM.pdf]
